# Supplementary material for: LakeSST: Lake Skin Surface Temperature in French inland water bodies for 1999–2016 from Landsat archives
Source: Copernicus journal article supplement (doi:10.5194/essd-10-727-2018), 2018-04-11
Supplement: Supplementary file 1 [file essd-10-727-2018-supplement.zip]

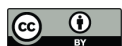

## *Supplement of*

# **LakeSST: Lake Skin Surface Temperature in French inland water bodies for 1999–2016 from Landsat archives**

**Jordi Prats et al.**

*Correspondence to:* Jordi Prats ([jordi.prats@irstea.fr](mailto:jordi.prats@irstea.fr), [jordipratsrodriguez@gmail.com](mailto:jordipratsrodriguez@gmail.com))

- [essd-10-727-2018-supplement-title-page.pdf](#)
- [coare\\_3\\_0.R](#)

The copyright of individual parts of the supplement might differ from the CC BY 4.0 License.
